# Supplementary material for: Pd-doped HKUST-1 MOFs for enhanced hydrogen storage: effect of hydrogen spillover
Source: Royal Society of Chemistry journal article supplement (doi:10.1039/d3ra01788e), 2023-01-01
Supplement: d3ra01788e1.pdf [file d3ra01788e1.pdf]

## Supporting Information

# Pd-doped HKUST-1 MOFs for enhanced hydrogen storage: effect of hydrogen spillover

Xiaoyu Hu<sup>a, b</sup>, Jingchuan Wang<sup>c</sup>, Shangkun Li<sup>d</sup>, Xuanhao Hu<sup>e</sup>, Rongxing Ye<sup>c</sup>, Linsen Zhou<sup>c</sup>, Peilong Li<sup>c, \*</sup>, Changlun Chen<sup>a, \*</sup>

<sup>a</sup>Institute of Plasma Physics, HFIPS, Chinese Academy of Sciences, Hefei 230031, PR China

<sup>b</sup>University of Science and Technology of China, Hefei 230026, PR China.

<sup>c</sup>Institute of Materials, China Academy of Engineering Physics, Mianyang 621907, PR, China

<sup>d</sup>School of Electrical Engineering, Southwest Jiaotong University, Chengdu 611756, China

<sup>e</sup>School of Physical Science and Technology, Xinjiang University, Urumqi 830046, China

Table S1. The physical and chemical properties of samples.

---

\* Corresponding author. E-mail: [clchen@ipp.ac.cn](mailto:clchen@ipp.ac.cn) (Chen), [dtscichina@126.com](mailto:dtscichina@126.com)(Li).

| Sample            | $S_{\text{BET}}$ ( $\text{m}^2 \text{g}^{-1}$ ) <sup>a</sup> | $V_{\text{micro}}$ ( $\text{cm}^3 \text{g}^{-1}$ ) <sup>a</sup> | Average Pore Size ( $\text{\AA}$ ) <sup>a</sup> | Cu/Pd content (%) <sup>b</sup> |
|-------------------|--------------------------------------------------------------|-----------------------------------------------------------------|-------------------------------------------------|--------------------------------|
| HKUST-1           | 1456.22                                                      | 0.50                                                            | 8.58                                            | -                              |
| Pd@HKUST-1-<br>DS | 1033.88                                                      | 0.35                                                            | 8.04                                            | 26.3/2.15                      |
| Pd/HKUST-1-IM     | 612.84                                                       | 0.26                                                            | -                                               | 28.7/2.22                      |

<sup>a</sup> The  $\text{N}_2$  physical adsorption-desorption at 77 K;

<sup>b</sup> The value was determined by inductively coupled plasma optical emission spectrometry (ICP-OES);

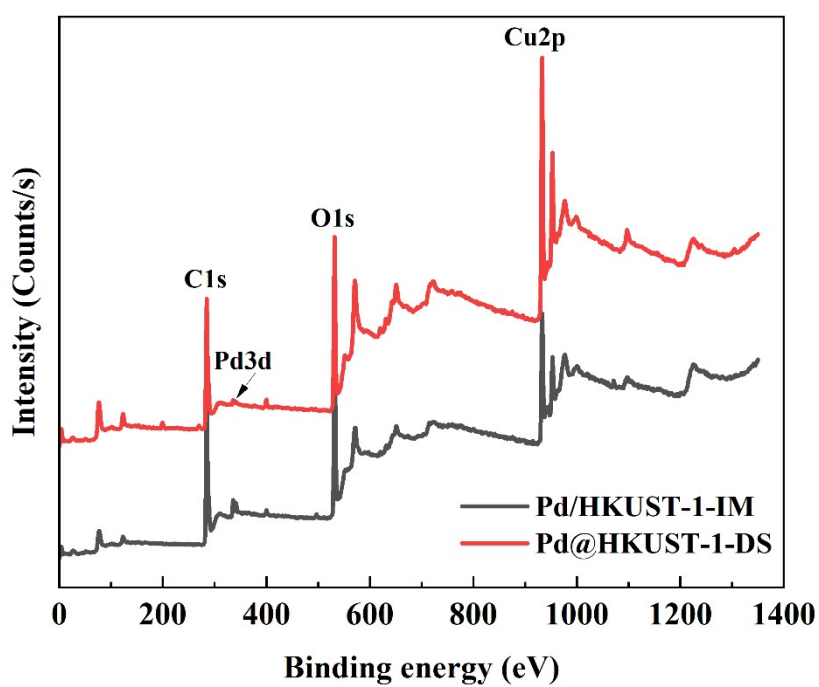

Fig. S1 XPS full spectra of Pd@HKUST-1-DS and Pd/HKUST-1-IM.

Table S2. Binding energies of Pd 3d peaks and Cu 2p peaks of samples.

| Peak                        | Pd 3d <sub>3/2</sub> / eV         | Pd 3d <sub>5/2</sub> / eV         | Cu 2p <sub>1/2</sub> / eV | Cu 2p <sub>3/2</sub> / eV |
|-----------------------------|-----------------------------------|-----------------------------------|---------------------------|---------------------------|
|                             | Pd <sup>0</sup> /Pd <sup>2+</sup> | Pd <sup>0</sup> /Pd <sup>2+</sup> |                           |                           |
| Pd nanocubes <sup>[1]</sup> | 339.4/342.2                       | 334.2/335.9                       | -                         | -                         |
| HKUST-1                     | -                                 | -                                 | 953.3                     | 933.4                     |
| Pd/HKUST-1-IM               | 340.8/342.3                       | 335.3/337.0                       | 952.8                     | 932.9                     |
| Pd@HKUST-1-<br>DS           | 340.9/342.4                       | 335.4/337.1                       | 952.6                     | 932.7                     |

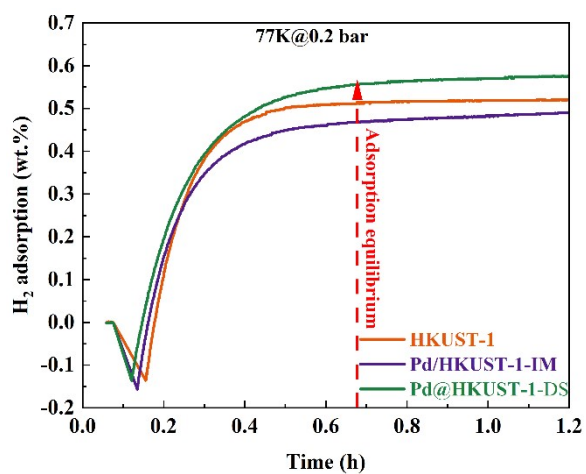

Fig. S2. Hydrogen adsorption kinetic of HKUST-1, Pd@HKUST-1-DS and Pd/HKUST-1IM at 77 K and 0.2 bar H<sub>2</sub>

Table S3. Comparison of hydrogen adsorption capacities of catalyst-decorated MOFs in the present work and previously reported spillover data and the comparison between measured and expected hydrogen adsorption in spillover materials in the recent literature and this Work.

| Samples                          | Specific surface area<br>(m <sup>2</sup> /g) | Temperature<br>(K) | Pressure<br>(bar) | H <sub>2</sub> uptake<br>(wt.%) |
|----------------------------------|----------------------------------------------|--------------------|-------------------|---------------------------------|
| ZIF-8 <sup>[2]</sup>             | 1297                                         | 298                | 10                | 0.078                           |
| ZIF-8/GO <sup>[2]</sup>          | 1247                                         | 298                | 10                | 0.073                           |
| Pt@ZIF/GO <sup>[2]</sup>         | 619                                          | 298                | 10                | 0.17                            |
| MIL-100(Al) <sup>[3]</sup>       | 1200                                         | 298                | 40                | 0.19                            |
| Pd/MIL-100(Al) <sup>[3]</sup>    | 380                                          | 298                | 40                | 0.35                            |
| IRMOF-8 <sup>[4]</sup>           | 1430                                         | 298                | 100               | 0.44                            |
| Pt/IRMOF <sup>[4]</sup>          | 1175                                         | 298                | 100               | 0.85                            |
| Cu-BTC <sup>[5]</sup>            | 1641                                         | 298                | 20                | 0.17                            |
| PtC/Cu-BTC <sup>[5]</sup>        | 1350                                         | 298                | 20                | 0.61                            |
| MIL-100 <sup>[6]</sup>           | 1797                                         | 298                | 31                | 0.25                            |
| Pt/AC-MIL-100 <sup>[6]</sup>     | 1552                                         | 298                | 31                | 0.41                            |
| UIO <sup>[7]</sup>               | 1386                                         | 303                | 31                | 0.18                            |
| aUIO-Ac <sup>[7]</sup>           | 1166                                         | 303                | 30                | 0.06                            |
| Pt/aUiO-Ac <sup>[7]</sup>        | 932                                          | 303                | 34                | 0.38                            |
| aUiO-Cl <sup>[7]</sup>           | 1070                                         | 303                | 31                | 0.08                            |
| Pt/aUiO-Cl <sup>[7]</sup>        | 893                                          | 303                | 33                | 0.71                            |
| OMHCS <sup>[8]</sup>             | 543                                          | 313                | 35                | 0.25                            |
| Pd@OMHCS-R <sup>[8]</sup>        | 359.9                                        | 313                | 35                | 0.51                            |
| Pd@OMHCS-I <sup>[8]</sup>        | 283.3                                        | 313                | 35                | 0.34                            |
| ACF <sup>[9]</sup>               | 1996                                         | 298                | 20                | 0.18                            |
| Pd-ACF <sup>[9]</sup>            | 1990                                         | 298                | 20                | 0.26                            |
| MIL-100(Fe)/GO-M <sup>[10]</sup> | 1801                                         | 298                | 50                | 2.02                            |
| HKUST-1                          | 1456.22                                      | 298                | 180               | 0.61                            |
| Pd@HKUST-1-DS                    | 1033.88                                      | 298                | 30/180            | 0.15/1.63                       |
| Pd@HKUST-1-IM                    | 612.84                                       | 298                | 30/180            | 0.12/1.14                       |

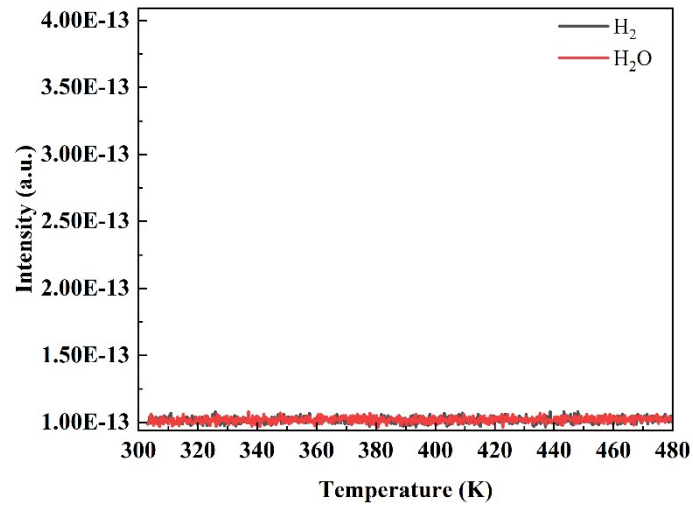

Fig. S3. Thermal desorption spectra of un-loading Pd@HKUST-1-DS at 298 K. The sample was evacuated for 5 min before heating at a rate of 5 K/min.

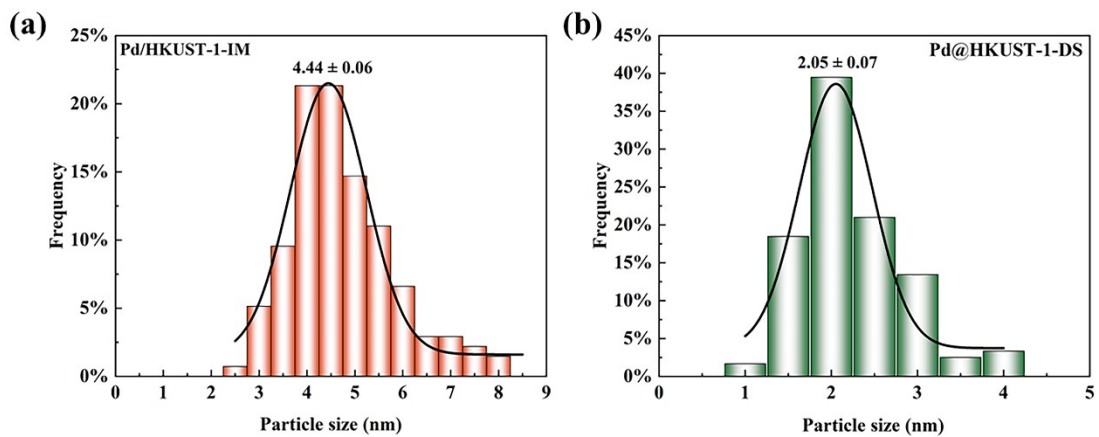

Fig. S4 Pd particle size distributions of Pd/HKUST-1-IM and Pd@HKUST-1-DS.

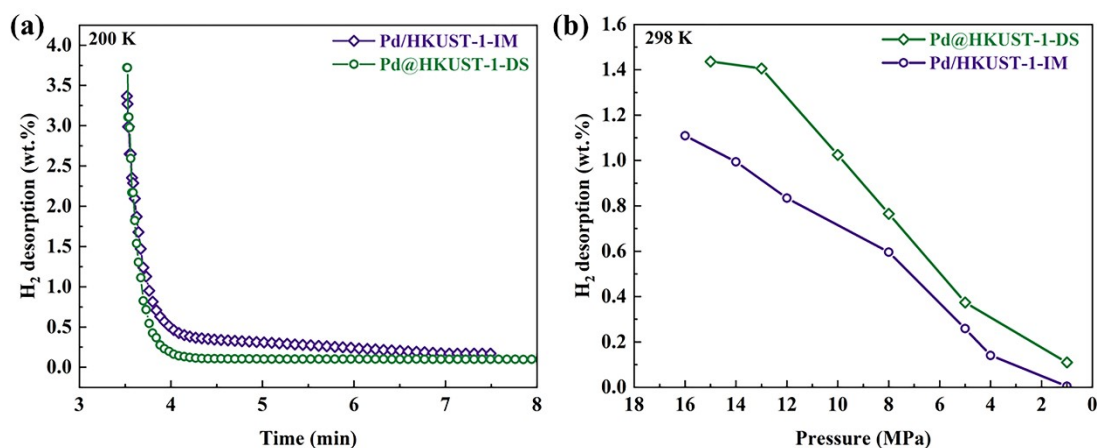

Fig. S5 Hydrogen adsorption isotherms of Pd@HKUST-1 and Pd/HKUST-1: (a) 200 K; (b) 298 K.

## References for Supporting Information

- [1] G. Li, H. Kobayashi, J. M. Taylor, R. Ikeda, Y. Kubota, K. Kato, M. Takata, T. Yamamoto, S. Toh, S. Matsumura, H. Kitagawa, *Nat. Mater.*, 2014, **13**, 802-806.  
DOI: <https://doi.org/10.1038/nmat4030>
- [2] H. Zhou, J. Zhang, J. Zhang, X. Yan, X. Shen, A. Yuan, *Int. J. of Hydrogen Energ.*, 2015, **40**, 12275-12285.  
DOI: <https://doi.org/10.1016/j.ijhydene.2015.05.199>
- [3] C. Zlotea, R. Campesi, F. Cuevas, E. Leroy, P. Dibandjo, C. Volkringer, T. Loiseau, G. Férey, M. Latroche, *J. Am. Chem. Soc.*, 2010, **132**, 2991-2997.  
DOI: <https://doi.org/10.1021/ja9084995>
- [4] L. Wang, N. R. Stuckert, H. Chen, R.T. Yang, *J. Phys. Chem. C*, 2011, **115**, 4793–4799.  
DOI: <https://doi.org/10.1021/jp111800c>
- [5] X. M. Liu, S. U. Rather, Q. Li, A. Lueking, Y. Zhao, J. Li, *J. Phys. Chem. C*, 2012, **116**, 3477–3485.

DOI: <https://doi.org/10.1021/jp207411b>

[6] A. K. Adhikari, K. S. Lin, C. S. Chang, *Res. Chem. Intermediat.*, 2015, **41**, 7655-7667.

DOI: <https://doi.org/10.1007/s11164-014-1850-z>

[7] P. C. Kang, Y. S. Ou, G. L. Li, J. K. Chang, C. Y. Wang, *ACS Appl. Nano Mater.*, 2021, **4**, 11269–11280.

DOI: <https://doi.org/10.1021/acsanm.1c02862>

[8] B. Zielinska, B. Michalkiewicz, X. Chen, E. Mijowska, R. J. Kalenczuk, *Chem. Phys. Letters*, 2016, **647**, 14-19.

DOI: <https://doi.org/10.1016/j.cplett.2016.01.036>

[9] C. I. Contescu, K. V. Benthem, S. Li, C. S. Bonifacio, S. J. Pennycook, P. Jena, N. C. Gallego, *Carbon*, 2011, **49**, 4050-4058.

DOI: <https://doi.org/10.1016/j.carbon.2011.05.021>

[10] C. Liu, D. Shen, Z. Tu, S. Li, *Int. J. Hydrogen Energ.*, 2022, **47**, 5393-5402.

DOI: <https://doi.org/10.1016/j.ijhydene.2021.11.168>
